# Supplementary material
Source: HighWire-hosted journal article supplement (https://bmjopenquality.bmj.com/highwire/filestream/135930/field_highwire_adjunct_files/0/Baseline_Measurements.pdf)

## Baseline Measurements

Percentage of patients whose medicines are reconciled within 24hours

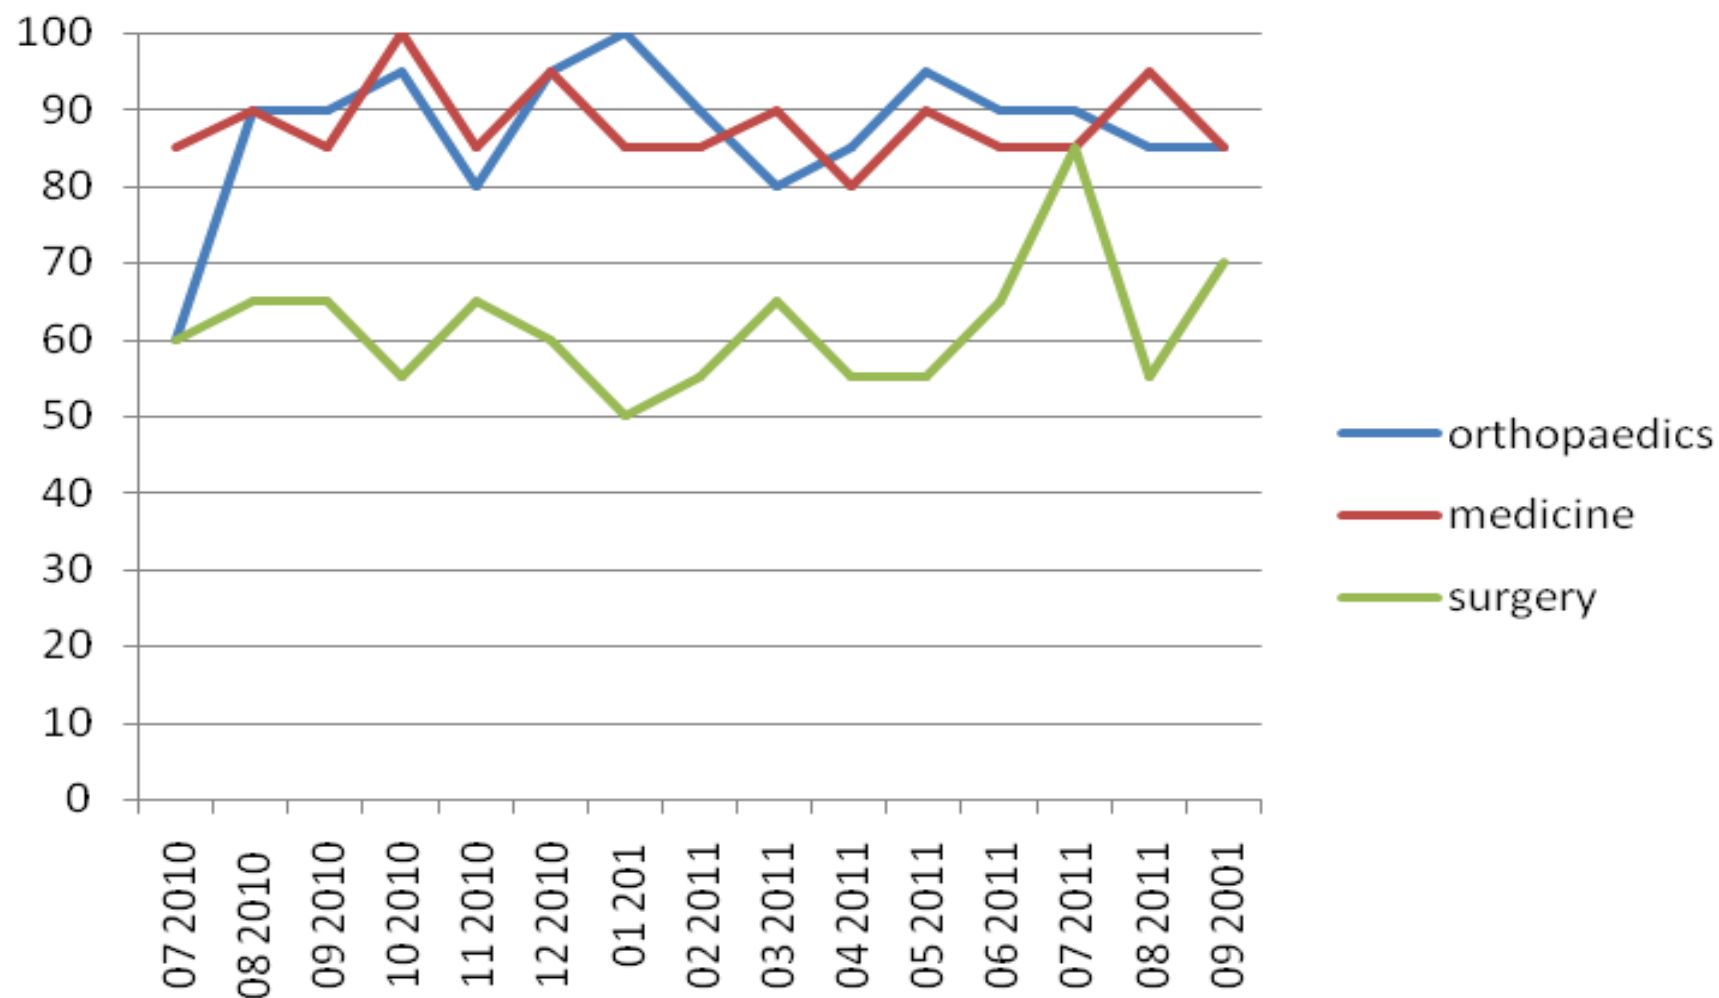

Supplement: Baseline_Measurements.pdf [file Baseline_Measurements.pdf]
